# Supplementary material for: Serum microRNA miR-491-5p/miR-206 Is Correlated with Poor Outcomes/Spontaneous Hemorrhagic Transformation after Ischemic Stroke: A Case Control Study
Source: MDPI journal article supplement (doi:10.3390/brainsci12080999), 2022-07-28
Supplement: s1 [file s1]

**Table S1.** The baseline characteristics of AIS patients with or without spontaneous HT.

|                                             | Overall (n=215)      | HT<br>(n=15)            | Non HT (n=200)       | p-value           |
|---------------------------------------------|----------------------|-------------------------|----------------------|-------------------|
| <b>Age,years, (mean (SD))</b>               | 66.69 (14.52)        | 78.40<br>(9.27)         | 65.81 (14.47)        | <b>0.001*</b>     |
| <b>Female, n (%)</b>                        | 83 (38.6)            | 10 (66.7)               | 73 (36.5)            | <b>0.041*</b>     |
| Onset to admission,h, median [IQR]          | 24.00 [8.50, 48.00]  | 24.00<br>[10.75, 36.00] | 24.00 [8.75, 48.00]  | 0.563             |
| Onset to blood sampling, h, median [IQR]    | 25.68 [5.75, 43.08]  | 19.76<br>[6.47, 28.48]  | 26.06 [5.73, 43.84]  | 0.314             |
| <b>GCS on admission,median [IQR]</b>        | 15.00 [13.00, 15.00] | 12.00<br>[10.00, 14.00] | 15.00 [13.00, 15.00] | <b>0.005*</b>     |
| <b>NIHSS on admission,median [IQR]</b>      | 6.00 [3.00, 12.00]   | 13.00<br>[6.50, 15.50]  | 6.00 [3.00, 12.00]   | <b>0.047*</b>     |
| Axillary temperature, °C, mean(SD)          | 36.53(0.44)          | 36.69(0.14)             | 36.51(0.03)          | 0.109             |
| History of risk factors                     |                      |                         |                      |                   |
| Hypertension, n (%)                         | 124 (57.7)           | 9 (60.0)                | 115 (57.5)           | 1                 |
| DM, n (%)                                   | 53 (24.7)            | 3 (20.0)                | 50 (25.0)            | 0.902             |
| Hyperlipodermia, n (%)                      | 8 (3.7)              | 1 (6.7)                 | 7 (3.5)              | 1                 |
| <b>AF, n (%)</b>                            | 31 (14.4)            | 7 (46.7)                | 24 (12.0)            | <b>0.001*</b>     |
| Acute heart infarction, n (%)               | 4 (1.9)              | 0 (0.0)                 | 4 (2.0)              | 1                 |
| Valvular heart disease, n (%)               | 11 (5.1)             | 0 (0.0)                 | 11 (5.5)             | 0.745             |
| Transient ischemic attack, n (%)            | 6 (2.8)              | 1 (6.7)                 | 5 (2.5)              | 0.895             |
| Acute ischemic stroke, n (%)                | 43 (20.0)            | 3 (20.0)                | 40 (20.0)            | 1                 |
| Hemorrhagic stroke, n (%)                   | 3 (1.4)              | 0 (0.0)                 | 3 (1.5)              | 1                 |
| Therapies before admission                  |                      |                         |                      |                   |
| Antiplatelet therapy, n (%)                 | 28 (13.0)            | 1 (6.7)                 | 27 (13.5)            | 0.718             |
| Lipid lowering, n(%)                        | 19 (8.8)             | 1 (6.7)                 | 18 (9.0)             | 1                 |
| Anticoagulant therapy, n(%)                 | 10 (4.7)             | 0 (0.0)                 | 10 (5.0)             | 0.802             |
| <b>TOAST classification (%)</b>             |                      |                         |                      | <b>0.001*</b>     |
| LAA                                         | 62 (28.8)            | 0 (0.0)                 | 62 (31.0)            |                   |
| SAO                                         | 49 (22.8)            | 1 (6.7)                 | 48 (24.0)            |                   |
| CE                                          | 58 (27.0)            | 11 (73.3)               | 47 (23.5)            |                   |
| SOE                                         | 5 (2.3)              | 0 (0.0)                 | 5 (2.5)              |                   |
| SOU                                         | 41 (19.1)            | 3 (20.0)                | 38 (19.0)            |                   |
| <b>ECASS classification (%)</b>             |                      |                         |                      | <b>&lt;0.001*</b> |
| No                                          | 200 (93.0)           | 0 (0.0)                 | 200 (100.0)          |                   |
| HI1                                         | 6 (2.8)              | 6 (40.0)                | 0 (0.0)              |                   |
| HI2                                         | 5 (2.3)              | 5 (33.3)                | 0 (0.0)              |                   |
| PH1                                         | 4 (1.9)              | 4 (26.7)                | 0 (0.0)              |                   |
| PH2                                         | 0 (0.0)              | 0 (0.0)                 | 0 (0.0)              |                   |
| Levels of miRNA expression, fold difference |                      |                         |                      |                   |
| miR-21-5p, median [IQR]                     | 0.82 [0.18, 4.10]    | 0.73 [0.33, 3.15]       | 0.83 [0.17, 4.07]    | 0.858             |
| miR-491-5p, median [IQR])                   | 0.98 [0.29, 2.45]    | 1.07 [0.35, 3.41]       | 0.98 [0.29, 2.45]    | 0.778             |
| miR-3123, median [IQR]                      | 1.60 [0.08, 12.26]   | 0.88 [0.01, 16.57]      | 1.81 [0.12, 11.69]   | 0.364             |

|                       |                   |                    |                   |              |
|-----------------------|-------------------|--------------------|-------------------|--------------|
| miR-206, median [IQR] | 1.15 [0.29, 7.57] | 7.55 [1.35, 50.79] | 0.99 [0.28, 5.93] | <b>0.04*</b> |
|-----------------------|-------------------|--------------------|-------------------|--------------|

---

AIS, acute ischemic stroke; HT, hemorrhagic transformation; SD, standard deviation; IQR, interquartile range; GCS, Glasgow Coma Scale; NIHSS, National Institutes of Health Stroke Scale; DM, diabetes mellitus; AF, atrial fibrillation; TOAST, Trial of Org 10,172 in Acute Stroke Treatment; LAA, large-artery atherosclerosis; SAO, small-artery occlusion; CE, cardioembolism; SOE, acute stroke of other determined etiology; SUE, stroke of underdetermined etiology; ECASS, The European Cooperative Acute Stroke Study; HI, hemorrhagic infarction; PH, parenchymal hemorrhage

\* $p < 0.05$
